# Supplementary material
Source: PubMed Central journal article supplement (PMC10064412)
Supplement: aim-olf-L230049-L23-0049_Supplement.pdf [file aim-olf-L230049-L23-0049_Supplement.pdf]

## **Supplementary Material\***

Mackey K, Kansagara D, Vela K. Update alert 10: risks and impact of angiotensin-converting enzyme inhibitors or angiotensin-receptor blockers on SARS-CoV-2 infection in adults. *Ann Intern Med.* 2023. [Epub ahead of print]. doi:10.7326/L23-0049

**Supplement Table 1. Study Characteristics and Results of Trials on ARB Initiation in COVID-19**

**Supplement Table 2. Quality Assessment of Trials on ARB Initiation in COVID-19**

**Supplement Table 3. Summary of Evidence for ARB Initiation in COVID-19**

**Supplement Table 4. Active Trials on ACEI/ARB Initiation in COVID-19 (updated 2 February 2023)**

\* This supplementary material was provided by the authors to give readers further details on their article. The material was not copyedited.

**Supplement Table 1. Study Characteristics and Results of Trials on ARB Initiation in COVID-19**

| Study, Country, Period                            | N   | Population                                                                       | Patient Characteristics (demographics for intervention versus comparator)                                                                                               | Intervention and Comparator                                                                                                                      | Primary Outcome Results (intervention versus comparator)                                                                                                                                                            | Mortality Results (if mortality was a secondary outcome)                                 |
|---------------------------------------------------|-----|----------------------------------------------------------------------------------|-------------------------------------------------------------------------------------------------------------------------------------------------------------------------|--------------------------------------------------------------------------------------------------------------------------------------------------|---------------------------------------------------------------------------------------------------------------------------------------------------------------------------------------------------------------------|------------------------------------------------------------------------------------------|
| Duarte (5), Argentina, 5/14/20-10/30/20           | 158 | Adults hospitalized with COVID-19                                                | Mean age: 67 v 64<br>Male: 44 v 63%<br>Race/ethnicity: NR<br>HTN: 44 v 45%<br>DM: 18 v 21%<br>CV disease: NR                                                            | Telmisartan 80 mg twice daily for 14 days compared to standard care                                                                              | CRP serum levels expressed as percentage of day 0: at day 5: -57.6 ±56.2% v 5.5 ± 122.2%; at day 8: -73.82 ± 38.41% v 13.9 ± 148.2%                                                                                 | 30-day mortality: 3/70 (4%) v 16/71 (23%)<br><br>RR = 0.19 [95% CI (0.06, 0.57)]         |
| Geriak (6), US, 3/30/20-7/4/20                    | 31  | Adults hospitalized with COVID-19 and mild to moderate hypoxia                   | Mean age: 59 v 55<br>Male: 63 v 60%<br>Black/AA: 6 v 0%<br>Hispanic: 75 v 87%<br>Asian: 0 v 0%<br>White: 6 v 13%<br>HTN: 44 v 33%<br>DM: 19 v 33%<br>CV disease: 6 v 0% | Losartan 12.5mg twice daily for 10 days (with up-titration at the decision of the treating clinician) compared to standard care                  | Need for ICU transfer: 1/16 (6%) v 2/15 (13%)                                                                                                                                                                       | In-hospital mortality: 1/16 (6%) v 1/15 (7%)                                             |
| Freilich (4), US, study end 5/27/21 (start NR)    | 14  | Adults hospitalized with COVID-19                                                | Mean age: 64 v 62<br>Male: 67 v 60%<br>White: 100 v 100%<br>HTN: NR<br>DM: 22 v 25%<br>CV disease: 22 v 80%                                                             | Losartan 25mg twice daily compared to placebo (3 participants) or lopinavir 400mg/ritonavir 100mg twice daily (2 participants) for 5-14 days     | Slopes of change for COVID-19 Ordinal Severity Score <sup>a</sup> : losartan vs. combined control (p = 0.4), losartan v placebo-only control (p = .05) (trend favoring placebo)                                     | 60-day mortality: 4/9 (44%) v 1/5 (20%), p = .9                                          |
| Jardine (2), India and Australia, 5/3/20-11/13/21 | 787 | Adults with COVID-19 in the inpatient setting (71%) and outpatient setting (29%) | Mean age: 49 v 49<br>Male: 254 v 251<br>Southern Asian: 99 v 99%<br>White: 1 v 1%<br>HTN: 24 v 31%<br>DM: 23 v 27%<br>CV disease: 3 v 3%                                | Telmisartan at a starting dose of 40mg daily vs placebo (in India) or an ARB at the discretion of the treating team vs usual care (in Australia) | WHO scale score at day 14: adjusted <sup>b</sup> odds ratio = 1.51 (95% credible interval 1.02 to 2.23) and WHO scale score at day 28: adjusted <sup>b</sup> odds ratio = 1.02 (95% credible interval 0.55 to 1.87) | 28-day mortality: 10/378 (3%) v 6/377 (2%); OR 1.74 (95% credible interval 0.62 to 5.25) |

|                                          |     |                                                                                                            |                                                                                                                                                                     |                                                                                         |                                                                                                                                                                                    |                                             |
|------------------------------------------|-----|------------------------------------------------------------------------------------------------------------|---------------------------------------------------------------------------------------------------------------------------------------------------------------------|-----------------------------------------------------------------------------------------|------------------------------------------------------------------------------------------------------------------------------------------------------------------------------------|---------------------------------------------|
| Nouri-Vaskeh (7), Iran, 4/2/20-6/30/20   | 80  | Adults hospitalized with COVID-19 and HTN                                                                  | Mean age: 67 v 60<br>Male: 54 v 46%<br>Race/ethnicity: NR<br>HTN: 100% (inclusion criteria)<br>DM: 11 v 8%<br>CV disease: 8 v 7%                                    | Losartan 25mg twice daily compared to amlodipine 5mg daily for at least 14 days         | 30-day mortality: 2/41 (5%) v 5/39 (13%), p = .241                                                                                                                                 | NA                                          |
| <b>Puskarich</b> (3), US, 4/1/20-2/28/21 | 205 | Adults hospitalized with COVID-19                                                                          | Mean age: 54 v 56<br>Male: 59 v 61%<br>Black/AA: 37 v 39%<br>Hispanic: 20 v 22%<br>Asian: 7 v 2%<br>White: 35 v 45%<br>HTN: 35 v 44%<br>DM: 19 v 25%<br>CAD: 3 v 7% | Losartan 50mg twice daily or placebo for 10 days or until hospital discharge            | Imputed arterial partial pressure of oxygen to fraction of inspired oxygen (PaO <sub>2</sub> :FiO <sub>2</sub> ) ratio at 7 days: difference, -24.8 [95% CI (-55.6, 6.1), p = .12] | 28-day mortality: 11/101 (11%) v 9/104 (9%) |
| Puskarich (8), US, 4/1/20-11/30/20       | 117 | Adults presenting for SARS-CoV-2 PCR testing in the outpatient setting and found to have a positive result | Mean age: 38 v 37<br>Male: 43 v 58%<br>Black/AA: 7 v 7%<br>Hispanic: 9 v 9%<br>Asian: 2 v 9%<br>White: 78 v 66%<br>HTN: 10 v 5%<br>DM: 7 v 5%<br>CV disease: 0 v 0% | Losartan 25mg twice daily (adjusted for renal function if needed) for 10 days v placebo | All-cause hospitalization at or before day 15: 3/58 (5%) v 1/59 (2%)<br><br>Absolute difference of -3.5% [95% CI (-13.2, 4.8%); p = .320] favoring placebo                         | No deaths among study participants          |

**Bold** = Newly included study in Update Alert 10

Notes:

<sup>a</sup> COVID-19 Ordinal Severity Score: 1) Death; 2) Hospitalized-on mechanical ventilation/ extracorporeal membrane oxygenation; 3) Hospitalized-on non-invasive ventilation; 4) Hospitalized-requiring oxygen; 5) Hospitalized-not requiring oxygen; 6) Not hospitalized-with limitations; 7) Not hospitalized-without limitations.

<sup>b</sup> Adjusted for age, sex, co-morbidities, hypertension, and oxygen requirement.

Abbreviations: CV=Cardiovascular disease; DM=Diabetes mellitus; HTN=Hypertension; N=Number of participants; NA=Not applicable; NR=NR; v = versus; OR= odds ratio; RR=relative risk.

**Supplement Table 2. Quality Assessment of Trials on ARB Initiation in COVID-19**

| <b>Study</b> | <b>Risk of bias from randomization process</b>                                                                                                                                                                        | <b>Risk of bias from deviation from intended interventions (assignment)</b>                                                                                                                                                  | <b>Risk of bias from deviation from intended interventions (adherence)</b>                                                                                                   | <b>Risk of bias from missing outcome data</b>               | <b>Risk of bias in measurement of the outcome</b>                                                                                          | <b>Risk of bias in selection of the reported result</b>                                                | <b>Overall Risk of Bias</b> |
|--------------|-----------------------------------------------------------------------------------------------------------------------------------------------------------------------------------------------------------------------|------------------------------------------------------------------------------------------------------------------------------------------------------------------------------------------------------------------------------|------------------------------------------------------------------------------------------------------------------------------------------------------------------------------|-------------------------------------------------------------|--------------------------------------------------------------------------------------------------------------------------------------------|--------------------------------------------------------------------------------------------------------|-----------------------------|
| Duarte (5)   | High<br>Allocation sequence was random but unclear if the sequence was concealed appropriately. Baseline differences in % male, % obese, and CRP levels raise concern about a problem with the randomization process. | Some concerns<br>Open label design in which participants and carers were aware of group. One patient in the intervention group did not receive the intervention after randomization. Study used intention-to-treat analysis. | Low<br>Open label design in which participants and carers were aware of group. Deviations from intended interventions were balanced. Study used intention-to-treat analysis. | Low<br>Primary outcome data available for all participants. | Low<br>Open label design but awareness of group assignment would not have affected laboratory data or other data obtained by chart review. | High<br>Study endpoints and some secondary outcomes were changed during the study period.              | High                        |
| Geriak (6)   | Some concerns<br>The allocation sequence and whether it was concealed were not reported. Baseline differences between groups do not suggest a problem with randomization.                                             | Some concerns<br>Open label design in which participants and carers were aware of group. One patient in the intervention group did not receive the intervention after randomization. Study used intention-to-treat analysis. | Low<br>Open label design in which participants and carers were aware of group. No reported deviations from intended interventions. Study used intention-to-treat analysis.   | Low<br>Primary outcome data available for all participants. | Low<br>Open label design but awareness of group assignment would not have affected laboratory data or other data obtained by chart review. | Low<br>Results were reported for all participants in concordance with the pre-specified analysis plan. | Some concerns               |
| Freilich (4) | Some concerns.<br>Block randomization process. Allocation sequence was                                                                                                                                                | Low<br>Double-blinded study. No apparent deviations from group assignment.                                                                                                                                                   | Low<br>Double-blinded study. No reported deviations from                                                                                                                     | Low<br>Primary outcome data available for all participants. | Low<br>Double-blinded study. Data obtained by chart review.                                                                                | Low<br>Results were reported for all participants in concordance                                       | Low                         |

|                           |                                                                                                                                                                                                                 |                                                                                                                            |                                                                                                                                  |                                                                                                                  |                                                                     |                                                                                                                |            |
|---------------------------|-----------------------------------------------------------------------------------------------------------------------------------------------------------------------------------------------------------------|----------------------------------------------------------------------------------------------------------------------------|----------------------------------------------------------------------------------------------------------------------------------|------------------------------------------------------------------------------------------------------------------|---------------------------------------------------------------------|----------------------------------------------------------------------------------------------------------------|------------|
|                           | <p>concealed. A higher percent of participants in the control group had heart disease and other co-morbidities. Otherwise, baseline differences between groups do not suggest a problem with randomization.</p> | <p>Study used intention-to-treat analysis.</p>                                                                             | <p>intended interventions. Study used intention-to-treat analysis.</p>                                                           |                                                                                                                  |                                                                     | <p>with the pre-specified analysis plan.</p>                                                                   |            |
| <p><b>Jardine (2)</b></p> | <p>Low<br/>Block randomization process. Allocation sequence was concealed. Baseline differences between groups do not suggest a problem with randomization.</p>                                                 | <p>Low<br/>Double-blinded study. No apparent deviations from group assignment. Study used intention-to-treat analysis.</p> | <p>Low<br/>Double-blinded study. No reported deviations from intended interventions. Study used intention-to-treat analysis.</p> | <p>Low<br/>Missing data are reported, and the study used statistical techniques to account for missing data.</p> | <p>Low<br/>Double-blinded study. Data obtained by chart review.</p> | <p>Low<br/>Results were reported for all participants in concordance with the pre-specified analysis plan.</p> | <p>Low</p> |

|                             |                                                                                                                                                                                                                                                                                 |                                                                                                                                                                     |                                                                                                                                                                                                                                                             |                                                                                                                               |                                                                                                                                                                                                                |                                                                                                                |                      |
|-----------------------------|---------------------------------------------------------------------------------------------------------------------------------------------------------------------------------------------------------------------------------------------------------------------------------|---------------------------------------------------------------------------------------------------------------------------------------------------------------------|-------------------------------------------------------------------------------------------------------------------------------------------------------------------------------------------------------------------------------------------------------------|-------------------------------------------------------------------------------------------------------------------------------|----------------------------------------------------------------------------------------------------------------------------------------------------------------------------------------------------------------|----------------------------------------------------------------------------------------------------------------|----------------------|
| <p>Nouri-Vaskeh (7)</p>     | <p>Some concerns<br/>Block randomization process with use of computer-generated random number. Allocation sequence was concealed. Baseline differences in participant age between groups raises concern about a problem with the randomization process.</p>                     | <p>Low<br/>Participants and carers were probably blinded to group allocation, but blinding is not well-described. No apparent deviations from group assignment.</p> | <p>Some concerns<br/>Participants and carers were probably blinded to group allocation, but blinding is not well-described. Two patients in the comparator group were lost to follow-up and it is unclear whether they received the intended treatment.</p> | <p>Some concerns<br/>Two patients in the comparator group were lost to follow-up and were not included in final analyses.</p> | <p>Low<br/>Participants and carers were probably blinded to group allocation but regardless, awareness of group assignment would not have affected laboratory data or other data obtained by chart review.</p> | <p>Low</p>                                                                                                     | <p>Some concerns</p> |
| <p><b>Puskarich (3)</b></p> | <p>Some concerns<br/>Block randomization process. Allocation sequence was concealed. Percentages of participants with co-morbidities was generally higher in the control group. Otherwise, baseline differences between groups do not suggest a problem with randomization.</p> | <p>Low<br/>Double-blinded study. No apparent deviations from group assignment. Study used intention-to-treat analysis.</p>                                          | <p>Low<br/>Double-blinded study. Deviations from intended interventions were balanced. Study used intention-to-treat analysis.</p>                                                                                                                          | <p>Low<br/>Missing data are reported, and the study used statistical techniques to account for missing data.</p>              | <p>Low<br/>Double-blinded study. Data obtained by chart review.</p>                                                                                                                                            | <p>Low<br/>Results were reported for all participants in concordance with the pre-specified analysis plan.</p> | <p>Low</p>           |

|               |                                                                                                                                                                                                                                          |                                                                                                                    |                                                                                                                            |                                                                                                      |                                                             |                                                                                                        |     |
|---------------|------------------------------------------------------------------------------------------------------------------------------------------------------------------------------------------------------------------------------------------|--------------------------------------------------------------------------------------------------------------------|----------------------------------------------------------------------------------------------------------------------------|------------------------------------------------------------------------------------------------------|-------------------------------------------------------------|--------------------------------------------------------------------------------------------------------|-----|
| Puskarich (8) | Some concerns<br>Block randomization process. Allocation sequence was concealed. A higher percent of males assigned to the comparator group. Otherwise, baseline differences between groups do not suggest a problem with randomization. | Low<br>Double-blinded study. No apparent deviations from group assignment. Study used intention-to-treat analysis. | Low<br>Double-blinded study. Deviations from intended interventions were balanced. Study used intention-to-treat analysis. | Low<br>Missing data are reported, and the study assessed the potential for bias due to missing data. | Low<br>Double-blinded study. Data obtained by chart review. | Low<br>Results were reported for all participants in concordance with the pre-specified analysis plan. | Low |
|---------------|------------------------------------------------------------------------------------------------------------------------------------------------------------------------------------------------------------------------------------------|--------------------------------------------------------------------------------------------------------------------|----------------------------------------------------------------------------------------------------------------------------|------------------------------------------------------------------------------------------------------|-------------------------------------------------------------|--------------------------------------------------------------------------------------------------------|-----|

**Bold** = Newly included study in Update Alert 10

**Supplement Table 3. Summary of Evidence for ARB Initiation in COVID-19**

| <b>Outcome</b>   | <b>Population</b>                     | <b>SOE</b>   | <b>No. Studies (N)<br/>Study Design</b> | <b>Study<br/>Limitations</b>                       | <b>Directness</b> | <b>Consistency</b> | <b>Precision</b> | <b>Finding</b>                                                                                                                                                                      |
|------------------|---------------------------------------|--------------|-----------------------------------------|----------------------------------------------------|-------------------|--------------------|------------------|-------------------------------------------------------------------------------------------------------------------------------------------------------------------------------------|
| Mortality        | Adults with COVID-19                  | Moderate     | 7 RCTs                                  | High (1 RCT); Some concerns (2 RCTs); Low (4 RCTs) | Direct            | Mostly consistent  | Imprecise        | 6 RCTs found no difference. 1 RCT found a reduced mortality risk with telmisartan compared to usual care [RR = 0.19; 95% CI (0.06, 0.57)].                                          |
| Disease severity | Adults hospitalized with COVID-19     | Moderate     | 3 RCTs                                  | Some concerns (1 RCT); Low (2 RCTs)                | Direct            | Consistent         | Precise          | 2 RCTs found no difference in severity scores and 1 RCT found no difference in need for intensive care.                                                                             |
| Hospitalization  | Non-hospitalized adults with COVID-19 | Insufficient | 1 RCT                                   | Low                                                | Direct            | Not applicable     | Precise          | 1 RCT found that losartan compared to placebo did not reduce hospitalization risk (absolute difference in all-cause hospitalization between groups was -3.5% favoring the placebo). |



**Supplement Table 4. Active Trials on ACEI/ARB Initiation in COVID-19 (updated 2 February 2023)**

| <b>Study Title</b>                                                                                                                                         | <b>NCT Identifier</b> | <b>Sponsor</b>                                      | <b>Intervention</b>                                                     | <b>Primary Outcome(s)</b>                                                                                                | <b>Enrollment</b> | <b>Status</b>                                     | <b>Estimated Completion Date</b> |
|------------------------------------------------------------------------------------------------------------------------------------------------------------|-----------------------|-----------------------------------------------------|-------------------------------------------------------------------------|--------------------------------------------------------------------------------------------------------------------------|-------------------|---------------------------------------------------|----------------------------------|
| Evaluation of the Potential Benefit of Renin-angiotensin System Inhibitors (RASi, ACEi/ARB) in High-risk Patients With COVID-19. The COVID-RASi Trial (18) | NCT04591210           | Ottawa Heart Institute Research Corporation, Canada | ACEI or ARB compared to usual care                                      | Death, mechanical ventilation, ICU admission, and major adverse cardiac events within the first 28 days of randomization | 1155 (Estimated)  | Recruiting; last update posted January 2023       | April 2023                       |
| Angiotensin Converting Enzyme Inhibitors in Treatment of Covid 19 (19)                                                                                     | NCT04345406           | Tanta University, Egypt                             | ACEIs with conventional treatment for COVID19 compared to standard care | Number of patients with virological cure                                                                                 | 60 (Estimated)    | Not yet recruiting; last update posted April 2020 | December 2029                    |
